# Supplementary material
Source: PubMed Central journal article supplement (PMC5676238)

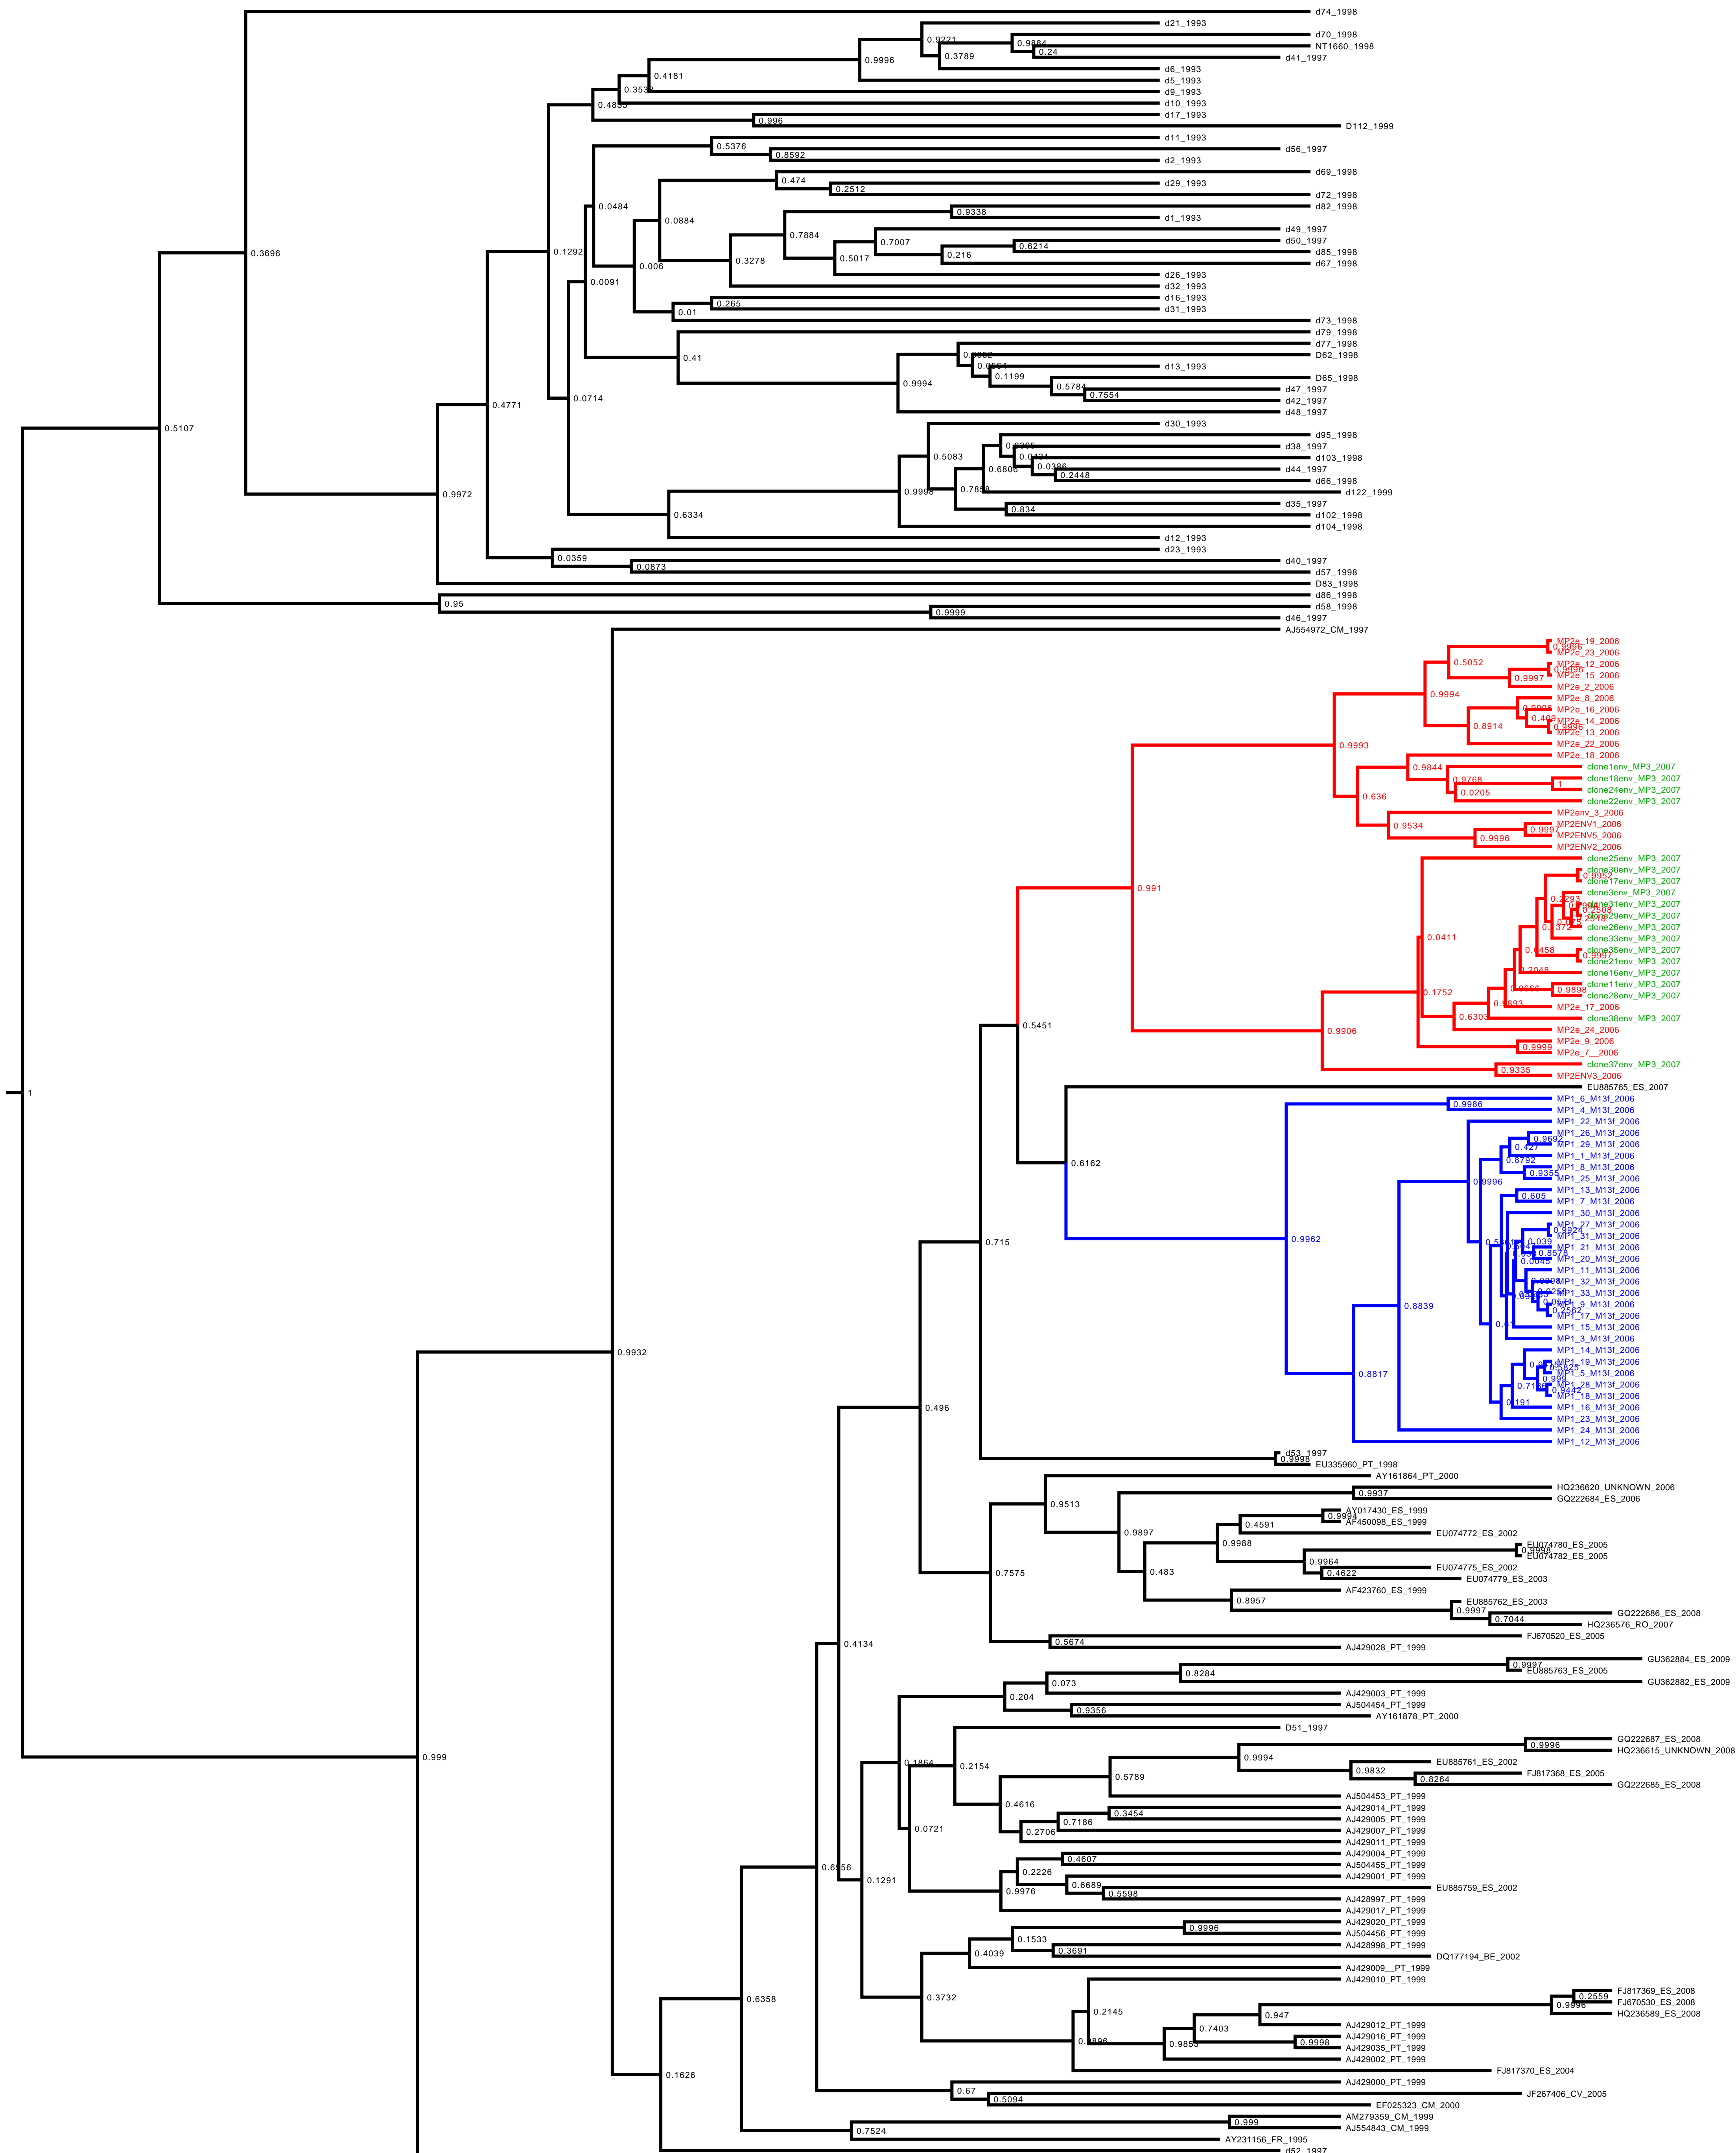

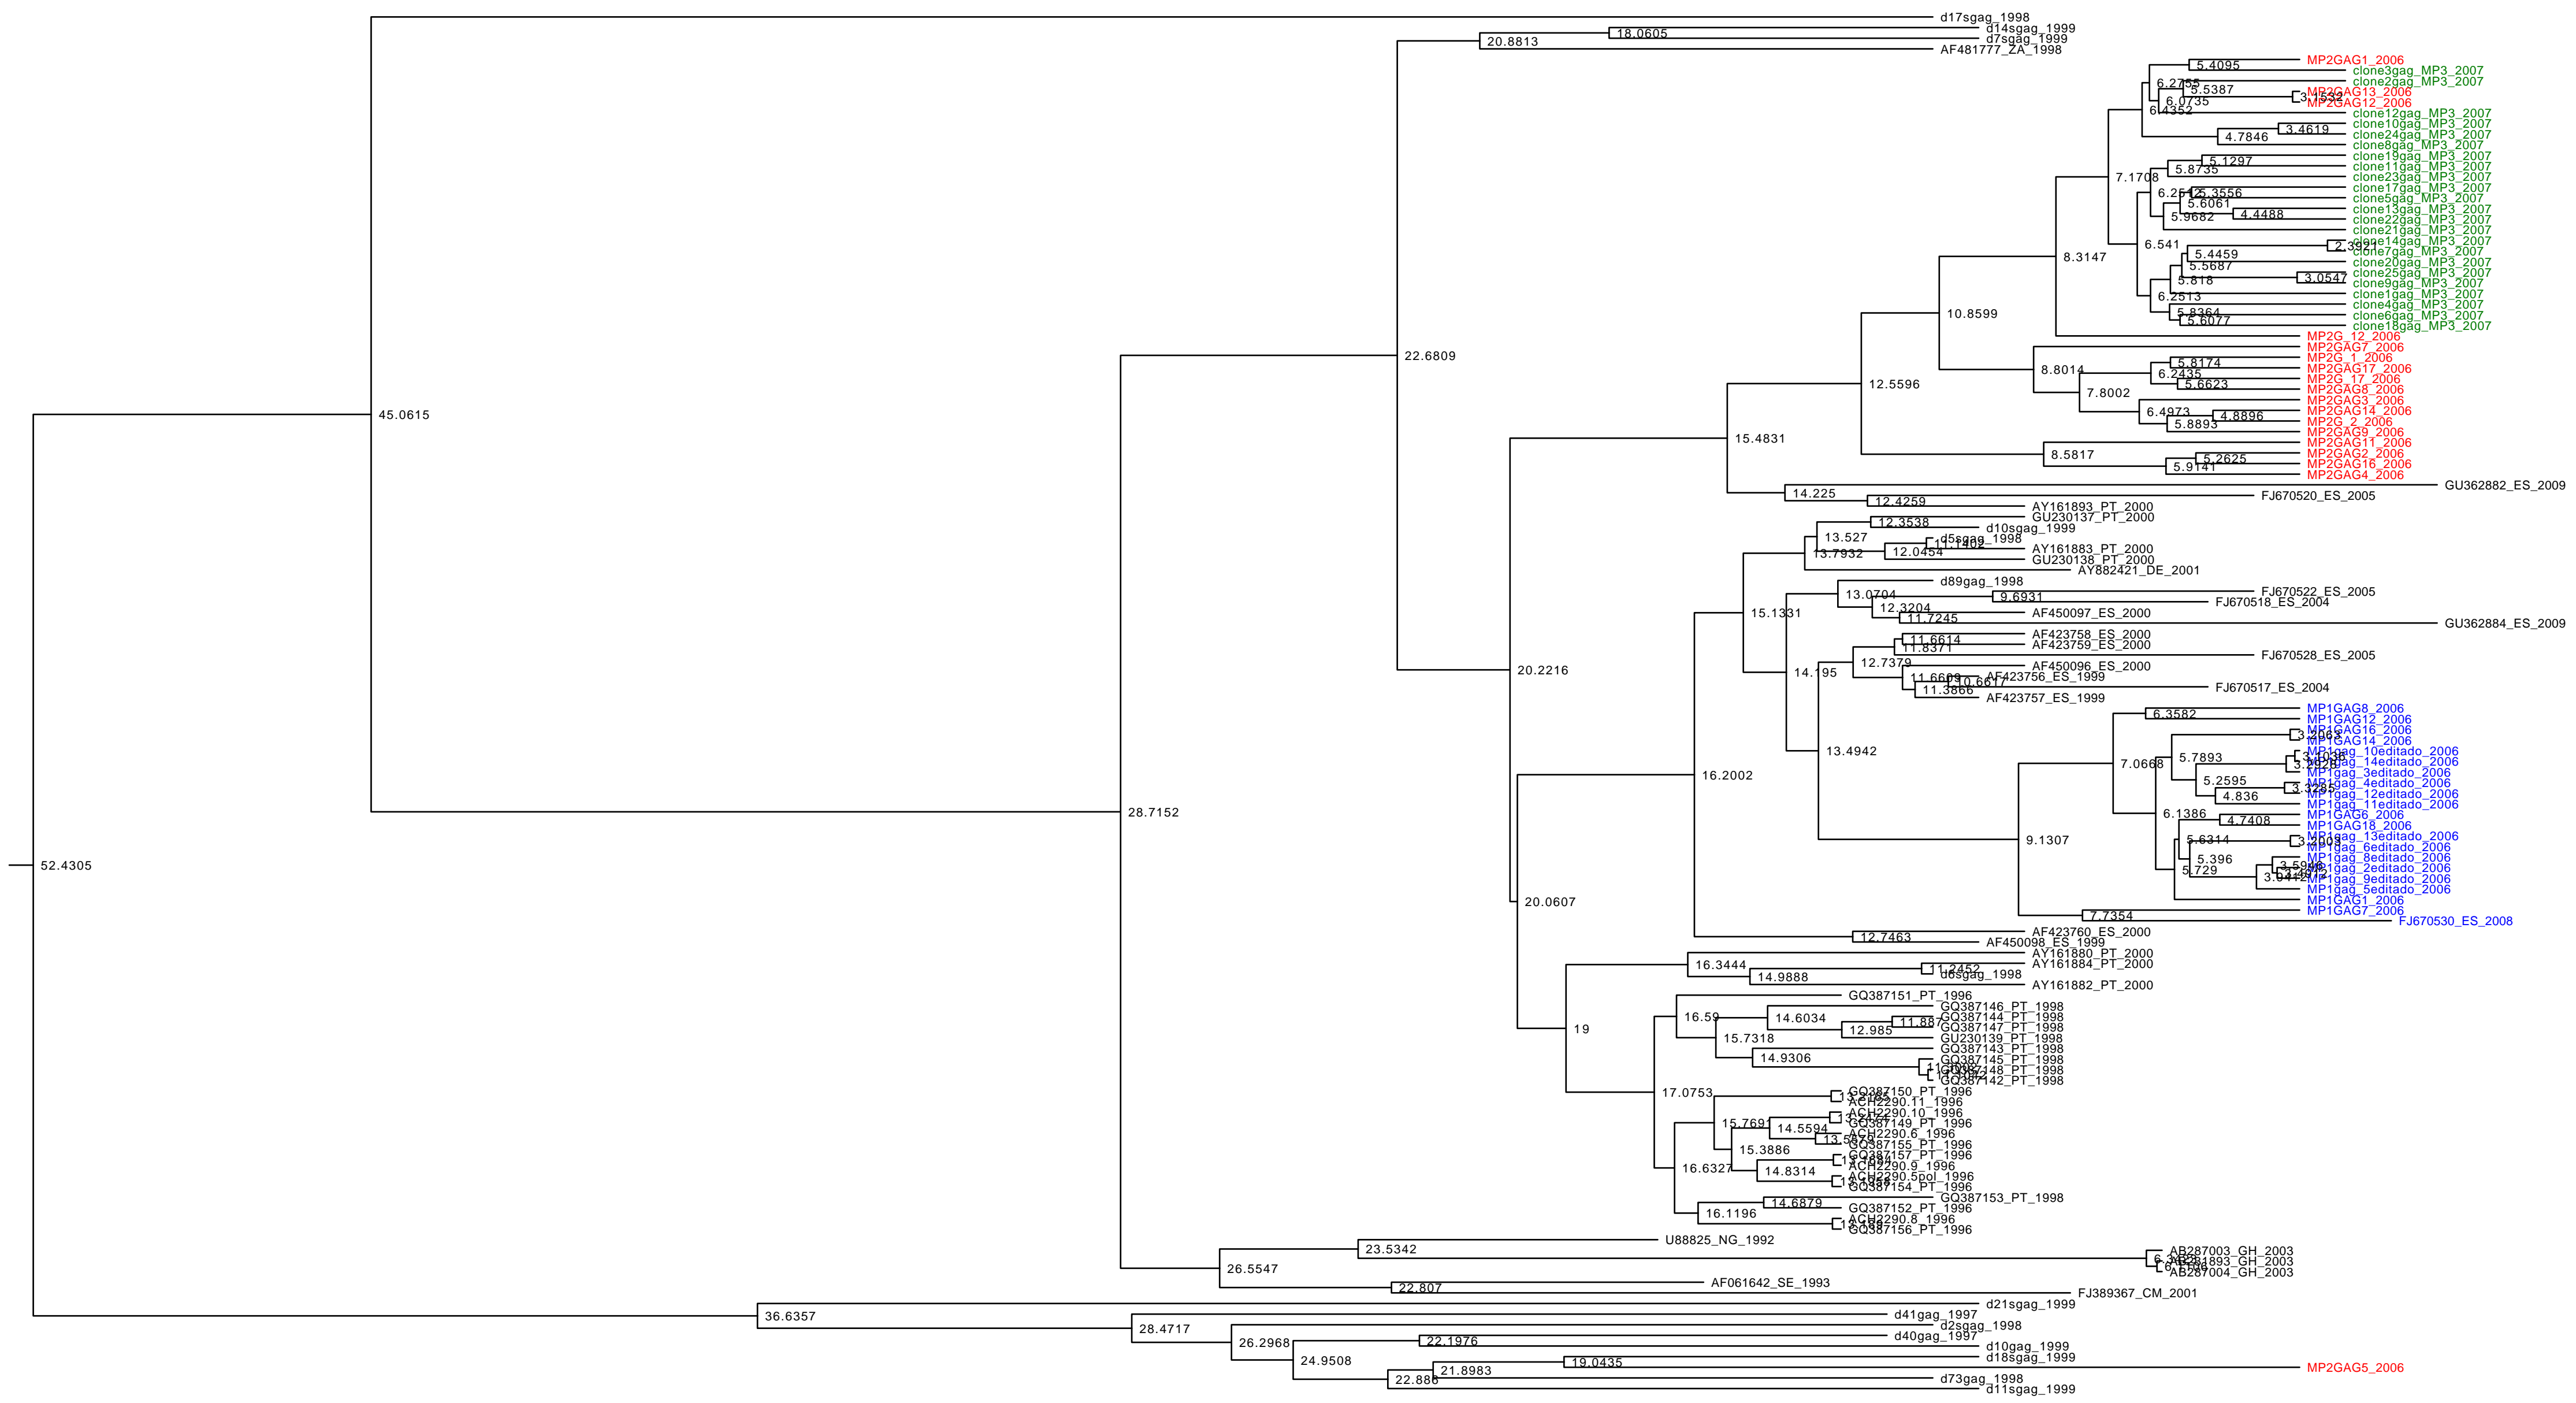

6.0

Supplement: 1089FigureS1.pdf [file 1089FigureS1.pdf]

Donor ■ MP2 ■ MP3

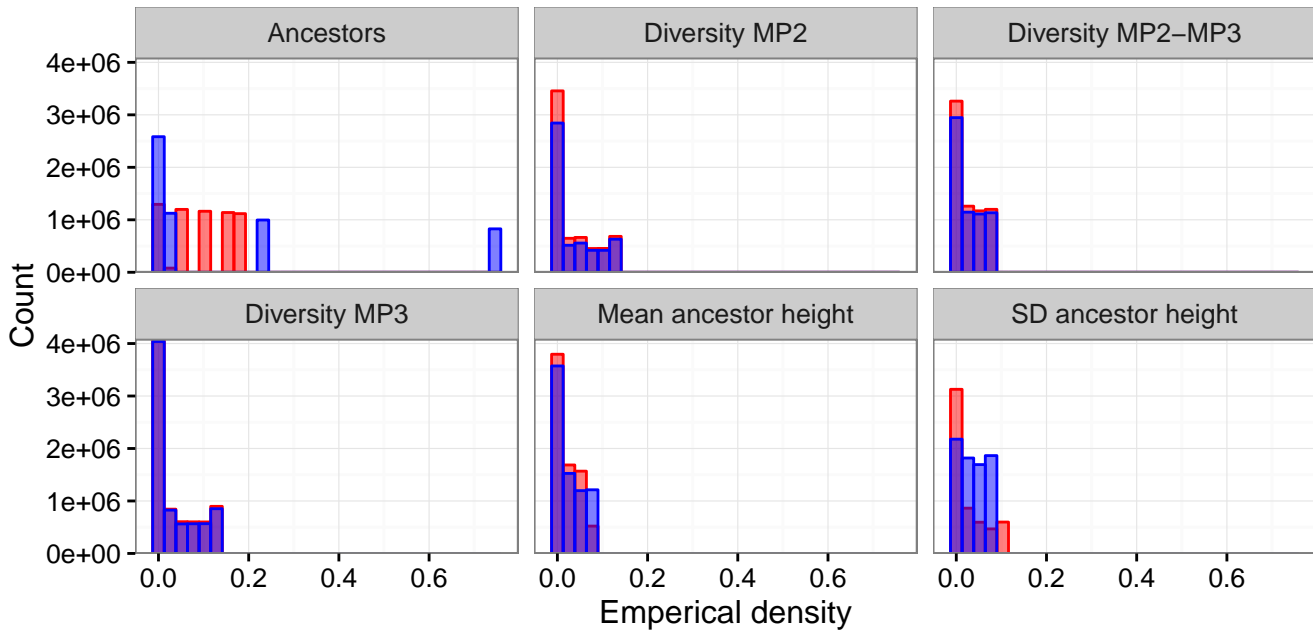

Supplement: 1089FigureS2.pdf [file 1089FigureS2.pdf]
